# Supplementary material for: Combination treatment with radiotherapy and a novel oxidative phosphorylation inhibitor overcomes PD-1 resistance and enhances antitumor immunity
Source: PubMed Central journal article supplement (PMC7319777; doi:10.1136/jitc-2019-000289), 2020-06-24
Supplement: jitc-2019-000289supp001.pdf [file jitc-2019-000289supp001.pdf]

## Supplemental Figure 1

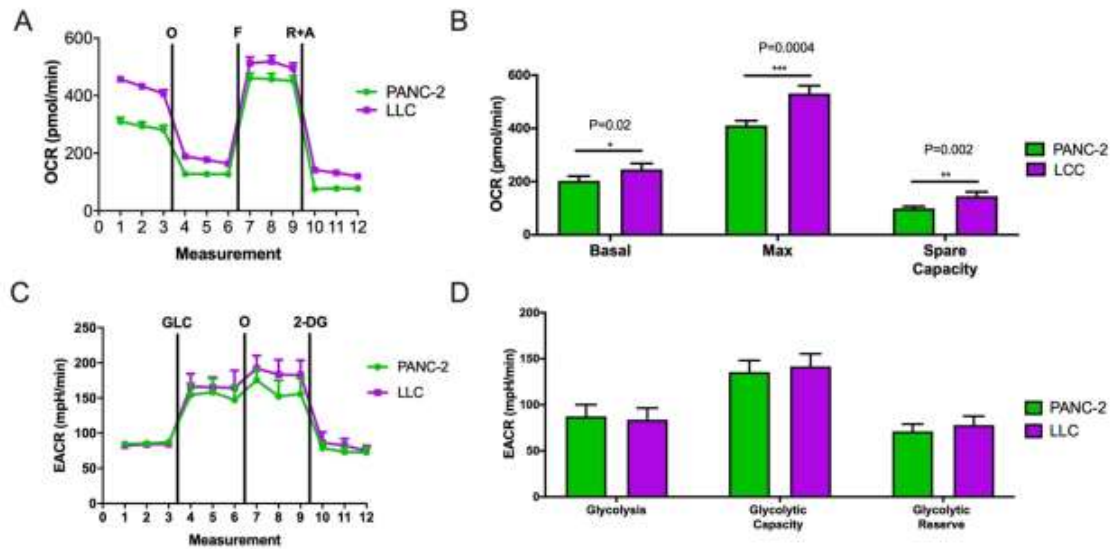

**Supplemental Figure 1. LLC cell line (PD-1 resistant) relies more on OXPHOS comparing to PANC-2 cell line (PD-1 sensitive).** (A) The Seahorse Mito Stress Test was performed to acquire baseline, oligomycin-inhibited, FCCP-activated, and rotenone/antimycin-inhibited OCR values. (B) Basal respiration ( $P = 0.02$ ), maximal respiration ( $P = 0.0004$ ), and spare respiratory capacity ( $P = 0.002$ ) were significantly higher in the LLC cell line (PD-1-resistant) than in the PANC-2 cell line (PD-1-sensitive). (C) The Seahorse Glycolysis Stress Test captured baseline, glucose-stimulated, oligomycin-activated, and 2-deoxyglucose-inhibited ECAR values in these two models. (D) Glycolysis and glycolytic capacity did not differ between LLC and PANC-2 cell lines in glycolysis, glycolytic capacity and glycolytic reserve ( $P > 0.05$ , respectively).

## Supplemental Figure 2

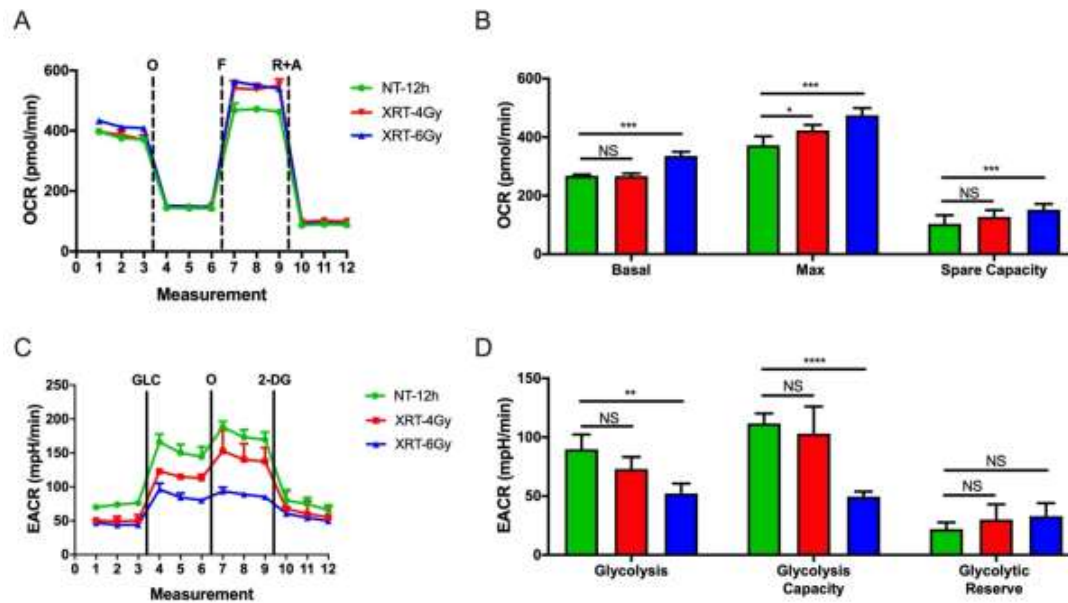

**Supplemental Figure 2. Radiotherapy (4Gy and 6Gy) increases oxidative phosphorylation (OXPHOS) and decreases glycolysis 12 hours after XRT in the PD-1-resistant model. (A)** Seahorse Mito Stress Test analysis showing oligomycin-inhibited (O), FCCP-activated (F), and rotenone/antimycin-inhibited (R+A) oxygen consumption rate (OCR) in the PD-1-resistant cell line 12 hours after XRT. **(B)** XRT significantly increased basal respiration ( $P = 0.0005$  in the 6 Gy group), maximal respiration (t-test,  $P = 0.011$  in the 4 Gy group;  $P < 0.0001$  in the 6 Gy group), and spare respiratory capacity (t-test,  $P = 0.019$  in the 6 Gy group) compared with control ( $n = 4$  wells/group). **(C)** Seahorse Glycolysis Stress Test analysis showing glucose-stimulated (GLC), oligomycin-activated (O), and 2-deoxyglucose-inhibited (2-DG) extracellular acidification rate (ECAR) in the PD-1-resistant cell line 12 hours after XRT. **(D)** XRT decreased glycolysis (t-test,  $P = 0.0003$  in the 6 Gy group) and glycolytic capacity (t-test,  $P < 0.0001$  in the 6 Gy group) compared with control ( $n = 4$  wells/group).

## Supplemental Figure 3

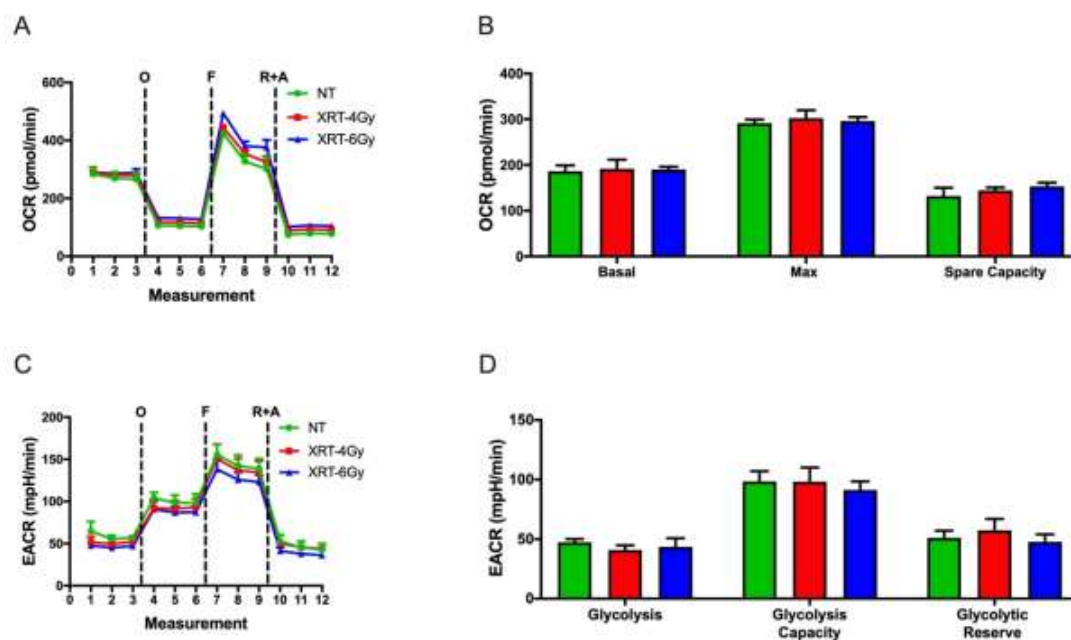

**Supplemental Figure 3. Seahorse analysis to test mitochondrial and glycolysis stress after 12 hour XRT with 4Gy or 6Gy in the PD-1-sensitive 344-SQ model.** In contrast to the PD-1 resistant model, no significant differences in OXPHOS (**A**) or glycolysis (**B**) were observed with irradiation.

## Supplemental Figure 4

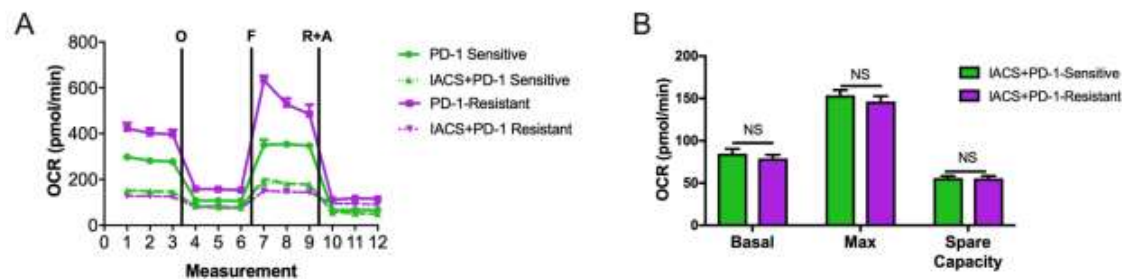

**Supplemental Figure 4** IACS-010759 inhibited OXPHOS activity effectively in PD-1 sensitive and resistant model. **(A)** Bioenergetics stress tests of PD-1 sensitive and PD-1 resistant cell lines following Vehicle or IACS-010759 treatment (50nM) for 12h in vitro. Oligomycin- inhibited (“O”), FCCP-activated (“F”) and Antimycin/Rotenone inhibited (“A&R”) OCR levels are indicated. **(B)** After IACS-010759 treatment 12h, PD-1 sensitive and resistant cell lines showed similar basal respiration ( $P = 0.74$ ), maximal respiration ( $P = 0.62$ ), and spare respiratory capacity ( $P = 0.9$ ).

## Supplemental Figure 5

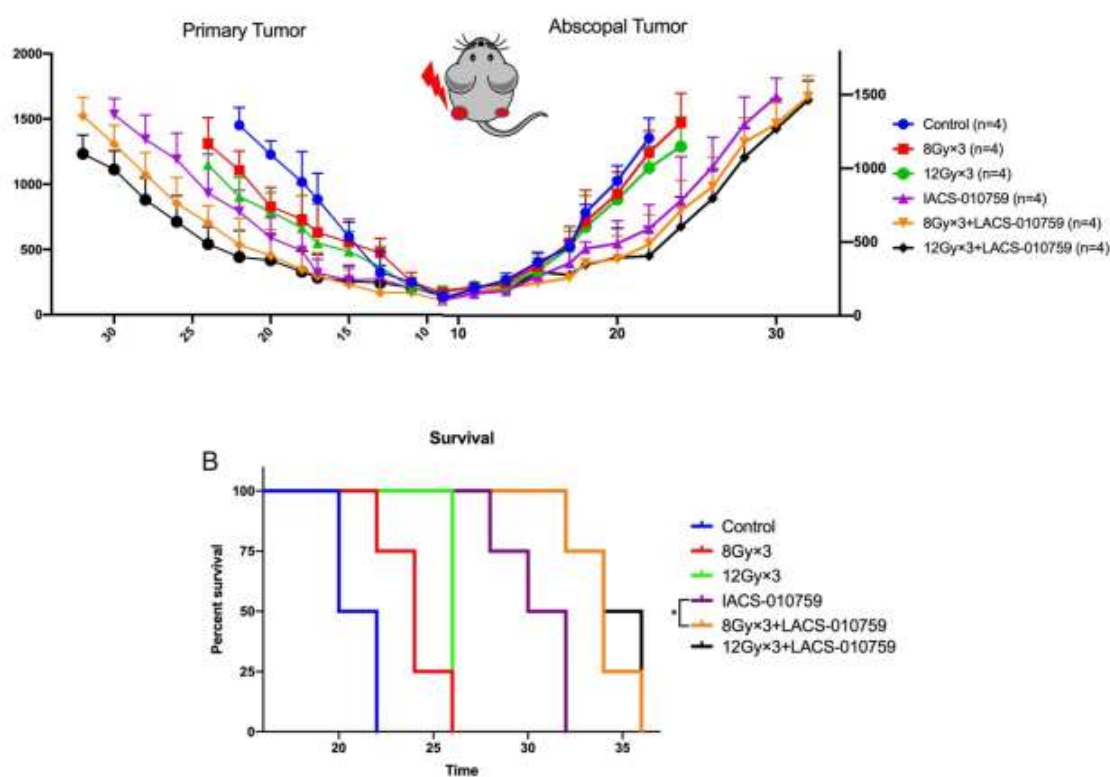

**Supplemental Figure 5. Radiotherapy (XRT) combined with IACS-010759 did not induce abscopal responses but significantly prolonged mouse survival. (A)** Neither 8 Gy × 3 nor 12 Gy × 3 XRT combined with IACS-010759 induced an abscopal response (two-way ANOVA). **(B)** The combination of XRT with IACS-010759 significantly increased mouse survival compared with IACS-010759 alone (log-rank test,  $P = 0.028$  for 8 Gy × 3 and  $P = 0.014$  for 12 Gy × 3).

## Supplemental Figure 6

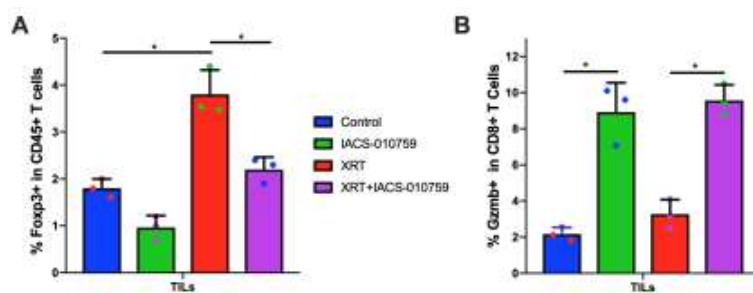**Supplemental Figure. 6 IACS-010759 decreased Tregs and increased Gzmb<sup>+</sup> CD8<sup>+</sup> T cells.**

(A) Similar with PD-1 resistant model, data in sensitive model also indicated that IACS-010759 decreased radiation-induced Tregs ( $P = 0.026$ , XRT alone compared with XRT combined with IACS-010759). (B) IACS-010759 also increased Gzmb<sup>+</sup> T cells compared with control ( $P = 0.031$ ), and the combination of XRT with IACS-010759 significantly increased Gzmb<sup>+</sup> T cells relative to XRT alone.
